# Supplementary material for: A Sterol from Soft Coral Induces Apoptosis and Autophagy in MCF-7 Breast Cancer Cells
Source: PubMed Central journal article supplement (PMC6071057; doi:10.3390/md16070238), 2018-07-17

# A Sterol from Soft Coral Induces Apoptosis and Autophagy in MCF-7 Breast Cancer Cells

Jing-Ru Weng<sup>1,2</sup>, Chang-Fang Chiu<sup>3,4</sup>, Jing-Lan Hu<sup>1</sup>, Chia-Hsien Feng<sup>5</sup>, Chiung-Yao Huang<sup>1</sup>, Li-Yuan Bai<sup>3,6,\*</sup>, and Jyh-Horng Sheu<sup>1,2,7,8,\*</sup>

<sup>1</sup> Department of Marine Biotechnology and Resources, National Sun Yat-sen University, Kaohsiung 80424, Taiwan; jrweng@mail.nsysu.edu.tw (J.-R.W.); m055020016@student.nsysu.edu.tw (J.-L.H.); huangcy@mail.nsysu.edu.tw (C.-Y.H.)

<sup>2</sup> Department of Medical Research, China Medical University Hospital, Taichung 40447, Taiwan

<sup>3</sup> Division of Hematology and Oncology, Department of Internal Medicine, China Medical University Hospital, Taichung 40402, Taiwan; d5686@mail.cmuh.org.tw

<sup>4</sup> Cancer Center, China Medical University Hospital, Taichung 40447, Taiwan

<sup>5</sup> Department of Fragrance and Cosmetic Science, College of Pharmacy, Kaohsiung Medical University, Kaohsiung 80708, Taiwan; chfeng@cc.kmu.edu.tw

<sup>6</sup> College of Medicine, China Medical University, Taichung 40402, Taiwan

<sup>7</sup> Graduate Institute of Natural Products, Kaohsiung Medical University, Kaohsiung 80708, Taiwan

<sup>8</sup> Frontier Center for Ocean Science and Technology, National Sun Yat-sen University, Kaohsiung 80424, Taiwan

| Figure | Caption                                                                                                                                                                                                                                                                                                                                                                                         | Page |
|--------|-------------------------------------------------------------------------------------------------------------------------------------------------------------------------------------------------------------------------------------------------------------------------------------------------------------------------------------------------------------------------------------------------|------|
| S1     | Inhibition effects of compound <b>1</b> relative to DMSO control on the cell proliferation in MDA-MB-231 cells. Cells were treated with compound <b>1</b> at indicated concentrations for 24 h or 48 h, and cell proliferation was determined by MTT assay. Points, means; bar, S.D. (n = 4-6). ** <i>p</i> < 0.01.                                                                             | 3    |
| S2     | Statistically analysis of cell cycle after the treatment of compound <b>1</b> in MDA-MB-231 cells. Cells were treated with compound <b>1</b> at the indicated concentrations for 48 h, followed by PI staining and flow cytometric analysis. Treatment with etoposide (ETO) at 10 μM was used as the positive control. Points, mean; bars, S.D. (n = 4). * <i>p</i> < 0.05, ** <i>p</i> < 0.01. | 4    |

|    |                                                                                                                                                                                                                                                                                                                          |   |
|----|--------------------------------------------------------------------------------------------------------------------------------------------------------------------------------------------------------------------------------------------------------------------------------------------------------------------------|---|
| S3 | Expression of p62 and LC3B in compound 1-treated MDA-MB-231 breast cancer cells for 48 h.                                                                                                                                                                                                                                | 5 |
| S4 | <p>Left, Western blot analyses of LC3B in compound 2 or compound 3 or 50 <math>\mu</math>M troglitazone (TRO) for 48 h in MCF-7 cells. Three independent experiments were performed, and the fold changes of LC3B-II/<math>\beta</math>-actin is presented in right panel.</p> <p>Points, means; bars, S.D. (n = 3).</p> | 6 |

### Supplementary materials and methods

*Inhibition effects of compound 1 relative to DMSO control on the cell proliferation in MDA-MB-231 cells.*

Cells ( $5 \times 10^3$ ) were treated with compound 1 or DMSO in 5% FBS-supplemented DMEM/F12 medium in 96-well plates. After 24 h, the medium was removed, replaced by 200  $\mu$ L DMEM/F12 containing 0.5 mg/mL of MTT, and cells were incubated in the CO<sub>2</sub> incubator at 37°C for 2 h. Supernatants were aspirated from the wells, and the reduced MTT dye was solubilized in 200  $\mu$ L/well DMSO. Absorbance at 570 nm was measured using a plate reader.

*Cell cycle analysis of compound 1 in MDA-MB-231 cells*

Cells ( $2 \times 10^5/3$  mL) were treated with DMSO or compound 1 for 48 h and washed twice with PBS, followed by staining with propidium iodide (PI) and analyzed by flow cytometry and the multicycler (ModFitLT 3.0) software program.

*Western blot analysis*

Western blot analysis was performed as previously report (Weng et. al, (2017) *Phytother. Res.*, 31, 1722-1730).

Figure S1

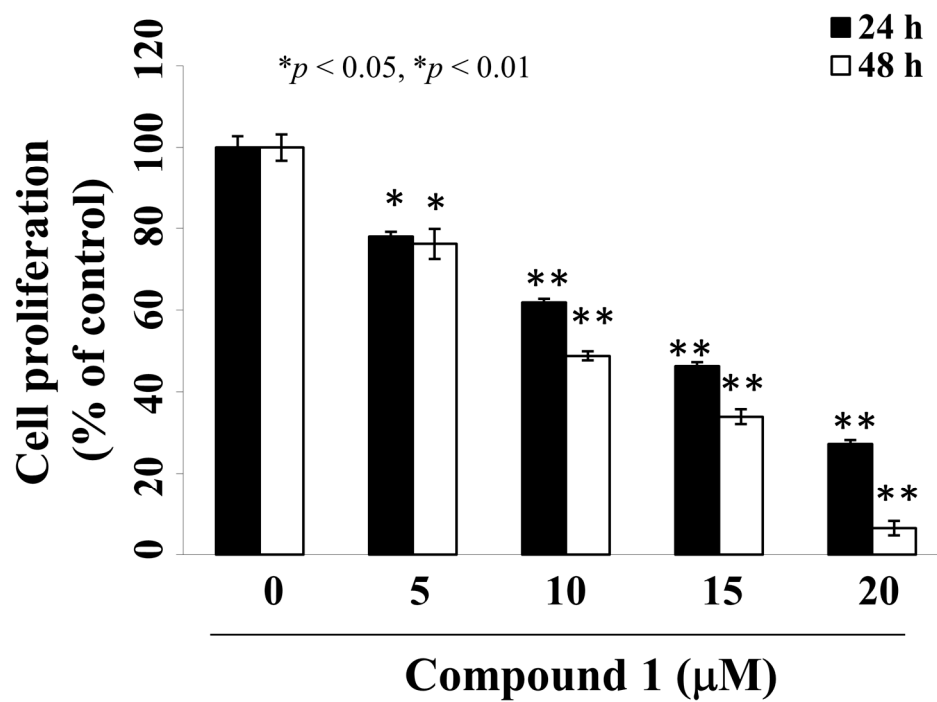

Figure S2

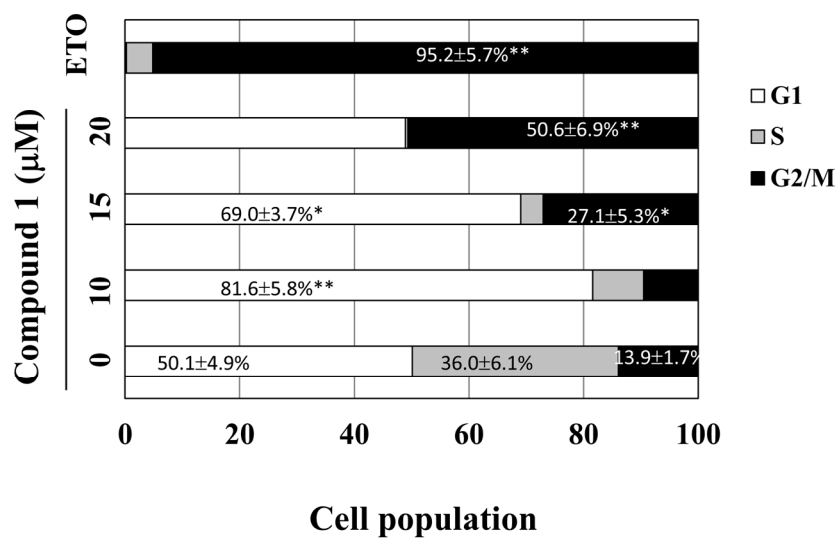

Figure S3

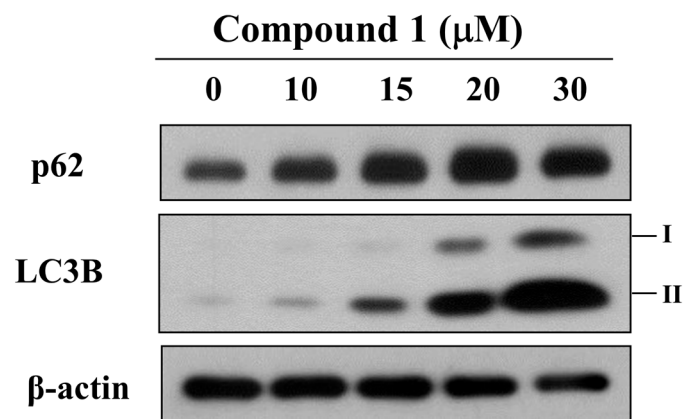

Figure S4

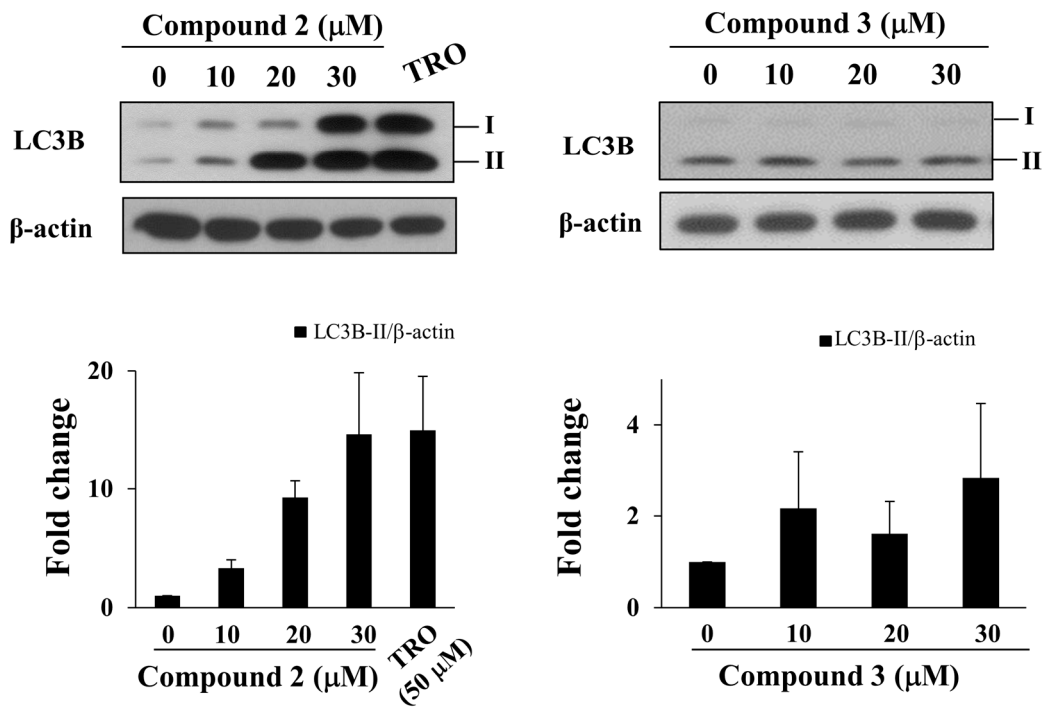

Supplement: marinedrugs-16-00238-s001.pdf [file marinedrugs-16-00238-s001.pdf]
